# Supplementary material for: Genome-wide association analysis for feed efficiency in Angus cattle
Source: PubMed Central journal article supplement (PMC3437496; doi:10.1111/j.1365-2052.2011.02273.x), 2012-08
Supplement: age0043-0367-SD1.pdf [file age0043-0367-SD1.pdf]

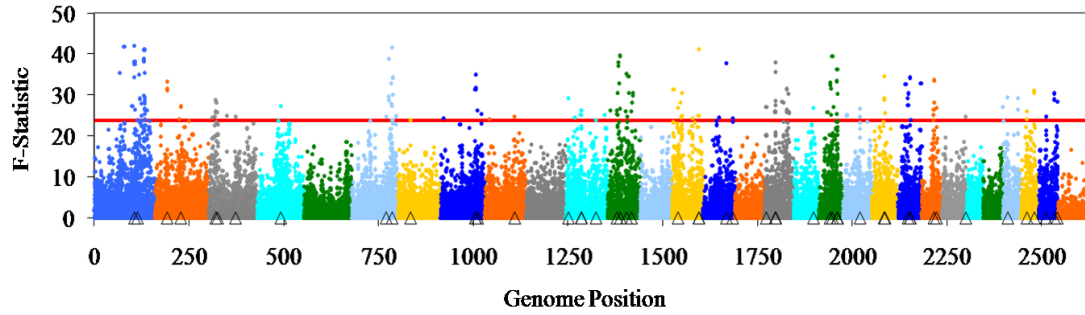

Figure S1: Genome-wide association analysis for AFI. The red line indicates the significance threshold for the analysis ( $F > 23.7162$ , genome-wide  $p < 0.05$ ) determined by permutation analysis ( $N = 10,000$ ). Black triangles indicate positions of the SNPs included in the final forward selection model.
