# Supplementary material for: Genome-wide association analysis for feed efficiency in Angus cattle
Source: PubMed Central journal article supplement (PMC3437496; doi:10.1111/j.1365-2052.2011.02273.x), 2012-08
Supplement: age0043-0367-SD4.pdf [file age0043-0367-SD4.pdf]

Table S1: ADG SNPs included in the final forward selection model. BTA and position denote the chromosome and chromosomal position from the Btau4.0 assembly, respectively. Abs( $\alpha$ ) denotes the absolute value of the allele substitution effect.  $2pq\alpha^2$  describes the genetic variance for each locus where the allele frequencies are p and q=1-p.

| Marker ID          | BTA | Position (Mb) | Abs( $\alpha$ ) | p      | $2pq\alpha^2$ |
|--------------------|-----|---------------|-----------------|--------|---------------|
| <i>ss86298222</i>  | 1   | 59.853273     | 0.0071          | 0.1060 | 0.0000095555  |
| <i>ss63968561</i>  | 1   | 63.570304     | 0.0006          | 0.5007 | 0.0000001800  |
| <i>ss61531716</i>  | 1   | 105.829263    | 0.0022          | 0.3696 | 0.0000022555  |
| <i>ss65172344</i>  | 1   | 108.073679    | 0.0018          | 0.3746 | 0.0000015182  |
| <i>ss86290982</i>  | 2   | 118.468144    | 0.0018          | 0.4513 | 0.0000016046  |
| <i>ss86298054</i>  | 2   | 118.498847    | 0.0051          | 0.4778 | 0.0000129793  |
| <i>ss86320968</i>  | 2   | 132.791346    | 0.0019          | 0.5315 | 0.0000017978  |
| <i>rs29015763</i>  | 3   | 18.495143     | 0.0042          | 0.7049 | 0.0000073392  |
| <i>ss86318343</i>  | 3   | 115.720543    | 0.0018          | 0.4420 | 0.0000015982  |
| <i>ss64165385</i>  | 4   | 27.465876     | 0.0078          | 0.4699 | 0.0000303099  |
| <i>ss86333174</i>  | 4   | 48.998895     | 0.0017          | 0.0709 | 0.0000003808  |
| <i>ss86293686</i>  | 4   | 88.599955     | 0.0053          | 0.5287 | 0.0000139989  |
| <i>ss61469518</i>  | 5   | 16.957757     | 0.0052          | 0.8539 | 0.0000067480  |
| <i>ss86335501</i>  | 5   | 33.048111     | 0.0027          | 0.3474 | 0.0000033056  |
| <i>ss61469484</i>  | 6   | 18.368731     | 0.019           | 0.0559 | 0.0000380870  |
| <i>ss86307817</i>  | 6   | 118.120363    | 0.006           | 0.6719 | 0.0000158719  |
| <i>ss117968894</i> | 7   | 26.449891     | 0.0046          | 0.7457 | 0.0000080252  |
| <i>ss65439566</i>  | 7   | 62.064599     | 0.0106          | 0.8625 | 0.0000266562  |
| <i>rs29012520</i>  | 7   | 65.978304     | 0.0004          | 0.9011 | 0.0000000285  |
| <i>ss86332207</i>  | 8   | 48.680422     | 0.0027          | 0.7915 | 0.0000024057  |
| <i>ss86317861</i>  | 8   | 51.089227     | 0.0068          | 0.5007 | 0.0000231200  |
| <i>ss86275977</i>  | 8   | 115.607565    | 0.0093          | 0.5451 | 0.0000428927  |
| <i>ss86317257</i>  | 9   | 12.902431     | 0.0049          | 0.7615 | 0.0000087223  |
| <i>ss86302682</i>  | 9   | 47.588815     | 0.0036          | 0.1332 | 0.0000029934  |
| <i>ss86290351</i>  | 10  | 15.067096     | 0.0045          | 0.3696 | 0.0000094366  |
| <i>ss86338016</i>  | 10  | 16.437278     | 0.0039          | 0.4692 | 0.0000075761  |
| <i>rs29010337</i>  | 10  | 68.029461     | 0.0046          | 0.5903 | 0.0000102352  |
| <i>ss61558932</i>  | 10  | 87.622309     | 0.0032          | 0.2894 | 0.0000042116  |
| <i>ss86327397</i>  | 11  | 12.784299     | 0.0069          | 0.1232 | 0.0000102865  |
| <i>ss86281383</i>  | 11  | 88.002621     | 0.0061          | 0.7092 | 0.0000153490  |
| <i>ss61521197</i>  | 12  | 24.477221     | 0.0033          | 0.2844 | 0.0000044324  |
| <i>ss86340783</i>  | 12  | 30.270048     | 0.0013          | 0.4878 | 0.0000008445  |
| <i>ss86318494</i>  | 12  | 73.030843     | 0.002           | 0.6168 | 0.0000018909  |
| <i>ss86307175</i>  | 13  | 28.958202     | 0.0003          | 0.4083 | 0.0000000435  |
| <i>ss86339064</i>  | 13  | 50.13714      | 0.0033          | 0.8309 | 0.0000030595  |
| <i>ss86325195</i>  | 13  | 59.746078     | 0.0044          | 0.7027 | 0.0000080888  |
| <i>ss86311856</i>  | 14  | 52.350311     | 0.0086          | 0.1920 | 0.0000229456  |

|                    |    |           |         |        |              |
|--------------------|----|-----------|---------|--------|--------------|
| <i>ss63983181</i>  | 16 | 7.036933  | 0.0024  | 0.1433 | 0.0000014140 |
| <i>ss86329933</i>  | 16 | 58.404713 | 0.0024  | 0.5974 | 0.0000027707 |
| <i>ss86298158</i>  | 17 | 12.720105 | 0.0057  | 0.1433 | 0.0000079757 |
| <i>ss62643327</i>  | 17 | 34.22045  | 0.0017  | 0.6705 | 0.0000012770 |
| <i>ss86303324</i>  | 17 | 76.421554 | 0.0089  | 0.1497 | 0.0000201668 |
| <i>ss117972449</i> | 18 | 29.600313 | 0.0024  | 0.6662 | 0.0000025618 |
| <i>ss86303954</i>  | 18 | 47.210624 | 0.0003  | 0.5387 | 0.0000000447 |
| <i>ss105259813</i> | 19 | 24.301922 | 0.0129  | 0.0938 | 0.0000283009 |
| <i>ss86283697</i>  | 19 | 45.340598 | 0.0046  | 0.2063 | 0.0000069296 |
| <i>ss117965335</i> | 19 | 48.738154 | 0.0058  | 0.6139 | 0.0000159472 |
| <i>ss117965434</i> | 19 | 63.651366 | 0.0074  | 0.5967 | 0.0000263558 |
| <i>ss62617158</i>  | 20 | 8.810833  | 0.0056  | 0.6261 | 0.0000146831 |
| <i>ss61543085</i>  | 20 | 26.966402 | 0.0011  | 0.6311 | 0.0000005634 |
| <i>ss86336107</i>  | 21 | 30.346882 | 0.0034  | 0.3259 | 0.0000050795 |
| <i>ss64618188</i>  | 21 | 32.67505  | 0.0148  | 0.0723 | 0.0000294018 |
| <i>ss62727144</i>  | 21 | 34.018769 | 0.0007  | 0.2407 | 0.0000001791 |
| <i>ss117965571</i> | 23 | 39.450899 | 0.0031  | 0.6032 | 0.0000046005 |
| <i>rs29018032</i>  | 23 | 41.988126 | 0.0021  | 0.8632 | 0.0000010416 |
| <i>ss86289007</i>  | 24 | 4.017729  | 0.0035  | 0.1332 | 0.0000028294 |
| <i>ss61547771</i>  | 24 | 52.914945 | 0.0058  | 0.4914 | 0.0000168150 |
| <i>ss117973804</i> | 25 | 12.283689 | 0.003   | 0.6318 | 0.0000041873 |
| <i>ss86284393</i>  | 25 | 37.212719 | 0.0032  | 0.4828 | 0.0000051139 |
| <i>ss86312150</i>  | 26 | 7.796869  | 0.0064  | 0.8016 | 0.0000130295 |
| <i>ss46526045</i>  | 26 | 43.529109 | 0.0037  | 0.5315 | 0.0000068178 |
| <i>ss86290736</i>  | 27 | 12.383786 | 0.005   | 0.8660 | 0.0000058005 |
| <i>ss61470138</i>  | 27 | 19.790331 | 0.0006  | 0.3782 | 0.0000001693 |
| <i>ss86295347</i>  | 29 | 48.856592 | <0.0000 | 0.9033 | 0.0000000000 |
| <i>ss86320739</i>  | Un |           | 0.0015  | 0.5222 | 0.0000011228 |
| <i>ss117974825</i> | Un |           | 0.0009  | 0.4291 | 0.0000003969 |
| <i>ss63781516</i>  | Un |           | 0.0044  | 0.7808 | 0.0000066269 |
| <i>ss65169323</i>  | Un |           | 0.0071  | 0.5444 | 0.0000250061 |

---
