# Supplementary material for: Genome-wide association analysis for feed efficiency in Angus cattle
Source: PubMed Central journal article supplement (PMC3437496; doi:10.1111/j.1365-2052.2011.02273.x), 2012-08
Supplement: age0043-0367-SD5.pdf [file age0043-0367-SD5.pdf]

Table S2: AFI SNPs included in the final forward selection model. BTA and position denote the chromosome and chromosomal position from the Btau4.0 assembly, respectively. Abs( $\alpha$ ) denotes the absolute value of the allele substitution effect.  $2pq\alpha^2$  describes the genetic variance for each locus where the allele frequencies are p and q=1-p.

| Marker ID          | BTA | Position (Mb) | Abs( $\alpha$ ) | p      | $2pq\alpha^2$ |
|--------------------|-----|---------------|-----------------|--------|---------------|
| <i>ss61531716</i>  | 1   | 105.8293      | 0.0177          | 0.3696 | 0.0001458301  |
| <i>ss105242396</i> | 1   | 113.8799      | 0.0434          | 0.4219 | 0.0009207200  |
| <i>ss105254260</i> | 2   | 31.07949      | 0.0346          | 0.6870 | 0.0005137263  |
| <i>ss86316304</i>  | 2   | 67.08311      | 0.0594          | 0.4011 | 0.0016969339  |
| <i>rs29015763</i>  | 3   | 18.49514      | 0.0128          | 0.7049 | 0.0000676351  |
| <i>ss86341694</i>  | 3   | 23.35313      | 0.0682          | 0.2600 | 0.0017904500  |
| <i>ss61517428</i>  | 3   | 70.78155      | 0.0089          | 0.1447 | 0.0000195622  |
| <i>ss86331253</i>  | 4   | 62.29809      | 0.0379          | 0.5595 | 0.0007065932  |
| <i>ss86297489</i>  | 6   | 90.41552      | 0.0042          | 0.5215 | 0.0000089004  |
| <i>ss86336887</i>  | 6   | 106.3529      | 0.0664          | 0.2085 | 0.0014558350  |
| <i>ss64249818</i>  | 7   | 32.4503       | 0.0137          | 0.3789 | 0.0000884855  |
| <i>ss86335346</i>  | 8   | 91.54707      | 0.0044          | 0.6934 | 0.0000082466  |
| <i>rs29022959</i>  | 8   | 91.71922      | 0.016           | 0.7213 | 0.0001026578  |
| <i>ss117969435</i> | 8   | 97.33553      | 0.032           | 0.8818 | 0.0002131990  |
| <i>ss61493344</i>  | 9   | 78.2669       | 0.0373          | 0.6368 | 0.0006444193  |
| <i>ss86278343</i>  | 11  | 5.66063       | 0.0326          | 0.0831 | 0.0001623506  |
| <i>ss86293568</i>  | 11  | 39.35181      | 0.0182          | 0.4097 | 0.0001609282  |
| <i>ss117970126</i> | 11  | 40.35811      | 0.0495          | 0.1218 | 0.0005230355  |
| <i>ss86289943</i>  | 11  | 78.30539      | 0.0299          | 0.7729 | 0.0003138842  |
| <i>rs29014508</i>  | 12  | 23.42551      | 0.0139          | 0.3489 | 0.0000876509  |
| <i>ss86274979</i>  | 12  | 32.53872      | 0.0079          | 0.8546 | 0.0000156294  |
| <i>ss61516394</i>  | 12  | 48.75502      | 0.0574          | 0.3274 | 0.0014530141  |
| <i>ss65270148</i>  | 12  | 61.90864      | 0.0099          | 0.1827 | 0.0000290295  |
| <i>ss86330336</i>  | 14  | 14.98921      | 0.0374          | 0.3782 | 0.0006580700  |
| <i>ss117964737</i> | 14  | 70.09761      | 0.0052          | 0.4986 | 0.0000136554  |
| <i>ss86295351</i>  | 15  | 61.34966      | 0.0413          | 0.5845 | 0.0008292738  |
| <i>ss86277466</i>  | 15  | 78.10219      | 0.0317          | 0.9226 | 0.0001430937  |
| <i>ss117972192</i> | 17  | 4.094041      | 0.0358          | 0.6132 | 0.0006066270  |
| <i>ss61467852</i>  | 17  | 27.83249      | 0.0274          | 0.6053 | 0.0003598838  |
| <i>ss61538007</i>  | 17  | 29.24063      | 0.0198          | 0.7285 | 0.0001555952  |
| <i>ss117965075</i> | 18  | 52.35454      | 0.0445          | 0.0953 | 0.0003418681  |
| <i>ss61540370</i>  | 19  | 29.93895      | 0.026           | 0.4362 | 0.0003327094  |
| <i>ss86328551</i>  | 19  | 36.05319      | 0.0292          | 0.1060 | 0.0001618659  |
| <i>ss117965335</i> | 19  | 48.73815      | 0.0352          | 0.6139 | 0.0005873731  |
| <i>ss86318895</i>  | 19  | 49.81029      | 0.0141          | 0.2299 | 0.0000702066  |
| <i>ss62644539</i>  | 20  | 43.75955      | 0.007           | 0.6648 | 0.0000219648  |
| <i>ss86339752</i>  | 21  | 31.52957      | 0.0415          | 0.8660 | 0.0003988280  |

|                    |    |          |        |        |              |
|--------------------|----|----------|--------|--------|--------------|
| <i>ss86277953</i>  | 21 | 33.92316 | 0.037  | 0.8875 | 0.0002738874 |
| <i>ss61545215</i>  | 22 | 25.57142 | 0.0631 | 0.6519 | 0.0018042927 |
| <i>ss61523365</i>  | 22 | 31.36968 | 0.0285 | 0.4599 | 0.0004035109 |
| <i>ss61494684</i>  | 23 | 32.16787 | 0.035  | 0.2894 | 0.0005038349 |
| <i>ss86341078</i>  | 23 | 38.86096 | 0.0354 | 0.2615 | 0.0004845156 |
| <i>rs29019360</i>  | 24 | 62.80138 | 0.0384 | 0.8116 | 0.0004508341 |
| <i>ss61550290</i>  | 27 | 13.17559 | 0.0103 | 0.7744 | 0.0000372182 |
| <i>ss86301648</i>  | 28 | 14.75985 | 0.0319 | 0.2550 | 0.0003862190 |
| <i>ss86331294</i>  | 28 | 34.27463 | 0.0401 | 0.6375 | 0.0007439119 |
| <i>ss86329884</i>  | 29 | 18.94255 | 0.0556 | 0.5723 | 0.0015132079 |
| <i>ss86291606</i>  | 29 | 41.28812 | 0.0601 | 0.8438 | 0.0009528913 |
| <i>ss86323038</i>  | 29 | 48.72363 | 0.0047 | 0.3739 | 0.0000102112 |
| <i>ss65170459</i>  | Un |          | 0.0024 | 0.2149 | 0.0000019275 |
| <i>ss86331954</i>  | Un |          | 0.0234 | 0.7342 | 0.0002132906 |
| <i>ss86275593</i>  | Un |          | 0.0127 | 0.2701 | 0.0000639601 |
| <i>ss117974956</i> | Un |          | 0.036  | 0.5974 | 0.0006228456 |

---
