# Supplementary material for: Genome-wide association analysis for feed efficiency in Angus cattle
Source: PubMed Central journal article supplement (PMC3437496; doi:10.1111/j.1365-2052.2011.02273.x), 2012-08
Supplement: age0043-0367-SD6.pdf [file age0043-0367-SD6.pdf]

Table S3: RFI SNPs included in the final forward selection model. BTA and position denote the chromosome and chromosomal position from the Btau4.0 assembly, respectively. Abs( $\alpha$ ) denotes the absolute value of the allele substitution effect.  $2pq\alpha^2$  describes the genetic variance for each locus where the allele frequencies are p and q=1-p.

| Marker ID          | BTA | Position (Mb) | Abs( $\alpha$ ) | p      | $2pq\alpha^2$ |
|--------------------|-----|---------------|-----------------|--------|---------------|
| <i>ss64260054</i>  | 1   | 85.95453      | 0.0185          | 0.1683 | 0.0000959028  |
| <i>ss86328736</i>  | 1   | 130.3111      | 0.046           | 0.2221 | 0.0007302880  |
| <i>ss105301409</i> | 1   | 133.5587      | 0.0261          | 0.1676 | 0.0001899456  |
| <i>ss117966494</i> | 2   | 31.05061      | 0.1186          | 0.3109 | 0.0060264845  |
| <i>ss105254260</i> | 2   | 31.07949      | 0.1426          | 0.6870 | 0.0087506812  |
| <i>ss61484491</i>  | 2   | 45.422        | 0.068           | 0.8474 | 0.0011943462  |
| <i>ss86293216</i>  | 2   | 76.35988      | 0.0433          | 0.6103 | 0.0008901653  |
| <i>ss61489474</i>  | 3   | 7.649577      | 0.0084          | 0.2751 | 0.0000281403  |
| <i>ss64836693</i>  | 3   | 70.03582      | 0.034           | 0.8847 | 0.0002361678  |
| <i>ss86331253</i>  | 4   | 62.29809      | 0.0213          | 0.5595 | 0.0002242468  |
| <i>ss64726870</i>  | 4   | 75.92411      | 0.0214          | 0.4312 | 0.0002245856  |
| <i>ss86274086</i>  | 5   | 35.90014      | 0.0189          | 0.2113 | 0.0001188279  |
| <i>ss61557043</i>  | 6   | 41.86704      | 0.0289          | 0.4341 | 0.0004112025  |
| <i>ss86297489</i>  | 6   | 90.41552      | 0.0051          | 0.5215 | 0.0000127277  |
| <i>ss86290408</i>  | 6   | 105.4025      | 0.0131          | 0.1812 | 0.0000507740  |
| <i>ss86293830</i>  | 7   | 14.27555      | 0.0066          | 0.3080 | 0.0000187780  |
| <i>ss86337575</i>  | 8   | 6.769905      | 0.0417          | 0.8009 | 0.0005549146  |
| <i>ss86339705</i>  | 8   | 56.62185      | 0.0249          | 0.5014 | 0.0003088333  |
| <i>rs29022959</i>  | 8   | 91.71922      | 0.0251          | 0.7213 | 0.0002524645  |
| <i>ss86308369</i>  | 8   | 110.8797      | 0.0375          | 0.7385 | 0.0005416445  |
| <i>ss64696603</i>  | 9   | 20.70463      | 0.0103          | 0.4405 | 0.0000527223  |
| <i>ss86328884</i>  | 9   | 34.81401      | 0.0474          | 0.0645 | 0.0002705972  |
| <i>ss61516025</i>  | 9   | 104.334       | 0.0171          | 0.2414 | 0.0001072975  |
| <i>ss86327686</i>  | 10  | 70.40733      | 0.0269          | 0.6454 | 0.0003312026  |
| <i>ss61491345</i>  | 10  | 80.49974      | 0.0022          | 0.6354 | 0.0000022528  |
| <i>ss117970126</i> | 11  | 40.35811      | 0.0359          | 0.1218 | 0.0002758223  |
| <i>ss86303685</i>  | 11  | 70.65666      | 0.042           | 0.6418 | 0.0008121868  |
| <i>ss86336779</i>  | 11  | 105.8802      | 0.0274          | 0.3109 | 0.0003222445  |
| <i>ss61516394</i>  | 12  | 48.75502      | 0.0084          | 0.3274 | 0.0000310742  |
| <i>ss61529532</i>  | 12  | 53.97856      | 0.0215          | 0.1519 | 0.0001187438  |
| <i>ss86341687</i>  | 12  | 72.39544      | 0.0512          | 0.8023 | 0.0008314600  |
| <i>ss117971065</i> | 14  | 3.606692      | 0.0037          | 0.5745 | 0.0000065778  |
| <i>ss86340984</i>  | 14  | 9.990357      | 0.0224          | 0.8188 | 0.0001490423  |
| <i>ss86300474</i>  | 14  | 78.08375      | 0.03            | 0.4140 | 0.0004353324  |
| <i>ss62125948</i>  | 15  | 42.20598      | 0.0147          | 0.7034 | 0.0000898396  |
| <i>ss86295351</i>  | 15  | 61.34966      | 0.0096          | 0.5845 | 0.0000444837  |
| <i>ss61565643</i>  | 16  | 14.41611      | 0.0071          | 0.8861 | 0.0000102154  |

|                    |    |          |        |        |              |
|--------------------|----|----------|--------|--------|--------------|
| <i>ss117972192</i> | 17 | 4.094041 | 0.0347 | 0.6132 | 0.0005725143 |
| <i>ss61538007</i>  | 17 | 29.24063 | 0.0263 | 0.7285 | 0.0002731933 |
| <i>ss117972116</i> | 17 | 29.40406 | 0.0123 | 0.5709 | 0.0000736419 |
| <i>ss117965075</i> | 18 | 52.35454 | 0.0371 | 0.0953 | 0.0002375236 |
| <i>ss86311733</i>  | 19 | 29.25672 | 0.0466 | 0.8782 | 0.0004634874 |
| <i>ss86329372</i>  | 19 | 35.72306 | 0.0081 | 0.4140 | 0.0000318354 |
| <i>ss86328551</i>  | 19 | 36.05319 | 0.0233 | 0.1060 | 0.0001031374 |
| <i>ss65376194</i>  | 20 | 6.746413 | 0.0168 | 0.3617 | 0.0001303928 |
| <i>ss86314901</i>  | 20 | 37.78467 | 0.022  | 0.5287 | 0.0002415123 |
| <i>ss61495644</i>  | 20 | 41.21733 | 0.0141 | 0.7622 | 0.0000725756 |
| <i>ss61511525</i>  | 20 | 50.48725 | 0.0288 | 0.8510 | 0.0002098884 |
| <i>ss86303118</i>  | 21 | 30.98376 | 0.0234 | 0.3231 | 0.0002394147 |
| <i>ss86277953</i>  | 21 | 33.92316 | 0.0326 | 0.8875 | 0.0002119006 |
| <i>ss61523365</i>  | 22 | 31.36968 | 0.0022 | 0.4599 | 0.0000024044 |
| <i>ss86295370</i>  | 22 | 56.05081 | 0.0246 | 0.5509 | 0.0002997658 |
| <i>rs29013532</i>  | 22 | 57.36246 | 0.0084 | 0.3181 | 0.0000308784 |
| <i>ss86316255</i>  | 23 | 32.67781 | 0.0466 | 0.0910 | 0.0003597838 |
| <i>ss61514878</i>  | 23 | 33.238   | 0.0091 | 0.4986 | 0.0000412229 |
| <i>ss86330971</i>  | 25 | 14.73887 | 0.0294 | 0.2414 | 0.0003158454 |
| <i>ss61486991</i>  | 25 | 23.12439 | 0.0172 | 0.6554 | 0.0001341521 |
| <i>ss86274817</i>  | 27 | 40.08445 | 0.0039 | 0.5193 | 0.0000076717 |
| <i>ss86321221</i>  | 28 | 14.30796 | 0.0569 | 0.1282 | 0.0007240181 |
| <i>ss86289932</i>  | 28 | 34.60799 | 0.0468 | 0.8961 | 0.0004068625 |
| <i>ss86294990</i>  | 29 | 19.5054  | 0.0291 | 0.7958 | 0.0002753421 |
| <i>ss86328651</i>  | 29 | 21.49747 | 0.0278 | 0.6626 | 0.0003457990 |
| <i>ss117965798</i> | 29 | 38.62682 | 0.0296 | 0.2185 | 0.0002981939 |
| <i>ss86319047</i>  | Un |          | 0.001  | 0.4076 | 0.0000005193 |
| <i>ss65170459</i>  | Un |          | 0.0142 | 0.2149 | 0.0000679447 |
| <i>ss86331954</i>  | Un |          | 0.0231 | 0.7342 | 0.0002089518 |

---
