# Supplementary material for: Genome-wide association analysis for feed efficiency in Angus cattle
Source: PubMed Central journal article supplement (PMC3437496; doi:10.1111/j.1365-2052.2011.02273.x), 2012-08
Supplement: age0043-0367-SD7.pdf [file age0043-0367-SD7.pdf]

Table S4: Pathway analysis of genomic regions detected as harboring QTLs in the analysis of ADG. Regions were defined as SNP position (from the final model)  $\pm 0.5$  Mb. Human annotations were mapped to bovine coordinates and genes were identified that spanned this region and analyzed in DAVID using the KEGG Pathway database.

| Pathway                                 | Accession                                          | Genes                                                                                                             |
|-----------------------------------------|----------------------------------------------------|-------------------------------------------------------------------------------------------------------------------|
| Alzheimer's disease                     | NM_000021                                          | presenilin 1                                                                                                      |
|                                         | NM_000447, NM_012486                               | presenilin 2 (Alzheimer disease 4)                                                                                |
| Calcium signaling pathway               | J05200, NM_000540                                  | ryanodine receptor 1 (skeletal)                                                                                   |
| Fc gamma R-mediated phagocytosis        | NM_198252, NM_000177                               | gelsolin (amyloidosis, Finnish type)                                                                              |
| Inositol phosphate metabolism           | BC062317                                           | inositol polyphosphate-5-phosphatase, 75kDa                                                                       |
| Long-term depression                    | J05200, NM_000540                                  | ryanodine receptor 1 (skeletal)                                                                                   |
| Lysosome                                | NM_001283, CR599373                                | adaptor-related protein complex 1, sigma 1 subunit                                                                |
|                                         | NM_003916                                          | adaptor-related protein complex 1, sigma 2 subunit pseudogene; adaptor-related protein complex 1, sigma 2 subunit |
|                                         | BC009606, BC021898                                 | adaptor-related protein complex 1, sigma 3 subunit                                                                |
| Neuroactive ligand-receptor interaction | NM_000830                                          | glutamate receptor, ionotropic, kainate 1                                                                         |
|                                         | NM_175768, AJ252246, NM_021956, BC037954, BC063814 | glutamate receptor, ionotropic, kainate 2                                                                         |
|                                         | AJ249210, NM_000831                                | glutamate receptor, ionotropic, kainate 3                                                                         |
| Neurotrophin signaling pathway          | NM_000021                                          | presenilin 1                                                                                                      |
| Notch signaling pathway                 | NM_000021                                          | presenilin 1                                                                                                      |
|                                         | NM_000447, NM_012486                               | presenilin 2 (Alzheimer disease 4)                                                                                |
| O-Glycan biosynthesis                   | NM_198321, AK023782                                | UDP-N-acetyl-alpha-D-galactosamine:polypeptide N-acetylgalactosaminyltransferase 10 (GalNAc-T10)                  |
|                                         | NM_001034845                                       | UDP-N-acetyl-alpha-D-galactosamine:polypeptide N-acetylgalactosaminyltransferase-like 6                           |
| Phosphatidylinositol signaling system   | BC062317                                           | inositol polyphosphate-5-phosphatase, 75kDa                                                                       |
| Regulation of actin cytoskeleton        | NM_198252, NM_000177                               | gelsolin (amyloidosis, Finnish type)                                                                              |
| Spliceosome                             | NM_004941, BC044586                                | DEAH (Asp-Glu-Ala-His) box polypeptide 8                                                                          |
| Wnt signaling pathway                   | NM_000021                                          | presenilin 1                                                                                                      |
