# Supplementary material for: Genome-wide association analysis for feed efficiency in Angus cattle
Source: PubMed Central journal article supplement (PMC3437496; doi:10.1111/j.1365-2052.2011.02273.x), 2012-08
Supplement: age0043-0367-SD8.pdf [file age0043-0367-SD8.pdf]

Table S5: Pathway analysis of genomic regions detected as harboring QTLs in the analysis of AFI. Regions were defined as SNP position (from the final model)  $\pm 0.5$  Mb. Human annotations were mapped to bovine coordinates and genes were identified that spanned this region and analyzed in DAVID using the KEGG Pathway database.

| Pathway                               | Accession                     | Genes                                                   |
|---------------------------------------|-------------------------------|---------------------------------------------------------|
| Alzheimer's disease                   | NM_003824                     | Fas (TNFRSF6)-associated via death domain               |
| Aminoacyl-tRNA biosynthesis           | NM_024678                     | asparaginyl-tRNA synthetase 2, mitochondrial (putative) |
| Apoptosis                             | NM_003824                     | Fas (TNFRSF6)-associated via death domain               |
| Chemokine signaling pathway           | NM_014800, AK126565, AL136787 | engulfment and cell motility 1                          |
| Endocytosis                           | NM_022739                     | SMAD specific E3 ubiquitin protein ligase 2             |
|                                       | NM_020429                     | SMAD specific E3 ubiquitin protein ligase 1             |
| Huntington's disease                  | NM_015477                     | SIN3 homolog A, transcription regulator (yeast)         |
| Pathways in cancer                    | NM_003824                     | Fas (TNFRSF6)-associated via death domain               |
|                                       | NM_005436                     | coiled-coil domain containing 6                         |
| Proteasome                            | NM_002804, BC106920           | proteasome (prosome, macropain) 26S subunit, ATPase, 3  |
| Purine metabolism                     | NM_033109                     | polyribonucleotide nucleotidyltransferase 1             |
| Pyrimidine metabolism                 | NM_033109                     | polyribonucleotide nucleotidyltransferase 1             |
| RIG-I-like receptor signaling pathway | NM_003824                     | Fas (TNFRSF6)-associated via death domain               |
| RNA degradation                       | NM_033109                     | polyribonucleotide nucleotidyltransferase 1             |
| TGF-beta signaling pathway            | NM_020429                     | SMAD specific E3 ubiquitin protein ligase 1             |
|                                       | NM_022739                     | SMAD specific E3 ubiquitin protein ligase 2             |
| Thyroid cancer                        | NM_005436                     | coiled-coil domain containing 6                         |
| Toll-like receptor signaling pathway  | NM_003824                     | Fas (TNFRSF6)-associated via death domain               |
| Ubiquitin mediated proteolysis        | NM_020429                     | SMAD specific E3 ubiquitin protein ligase 1             |
|                                       | NM_022739                     | SMAD specific E3 ubiquitin protein ligase 2             |
