# Supplementary material for: Genome-wide association analysis for feed efficiency in Angus cattle
Source: PubMed Central journal article supplement (PMC3437496; doi:10.1111/j.1365-2052.2011.02273.x), 2012-08
Supplement: age0043-0367-SD9.pdf [file age0043-0367-SD9.pdf]

Table S6: Pathway analysis of genomic regions detected as harboring QTLs in the analysis of RFI. Regions were defined as SNP position (from the final model)  $\pm 0.5$  Mb. Human annotations were mapped to bovine coordinates and genes were identified that spanned this region and analyzed in DAVID using the KEGG Pathway database.

| Pathway                                                    | Accession                       | Genes                                                                      |
|------------------------------------------------------------|---------------------------------|----------------------------------------------------------------------------|
| Acute myeloid leukemia                                     | NM_001556, BC108694             | inhibitor of kappa light polypeptide gene enhancer in B-cells, kinase beta |
| Adherens junction                                          | BC021301, NM_014808             | FERM, RhoGEF and pleckstrin domain protein 2                               |
| Adipocytokine signaling pathway                            | NM_001556, BC108694             | inhibitor of kappa light polypeptide gene enhancer in B-cells, kinase beta |
| Alzheimer's disease                                        | NM_002072, BC057777             | guanine nucleotide binding protein (G protein), q polypeptide              |
| Apoptosis                                                  | NM_001556, BC108694             | inhibitor of kappa light polypeptide gene enhancer in B-cells, kinase beta |
| B cell receptor signaling pathway                          | NM_001556, BC108694             | inhibitor of kappa light polypeptide gene enhancer in B-cells, kinase beta |
| Calcium signaling pathway                                  | NM_002067                       | guanine nucleotide binding protein (G protein), alpha 11 (Gq class)        |
|                                                            | NM_004297                       | guanine nucleotide binding protein (G protein), alpha 14                   |
|                                                            | NM_002072, BC057777             | guanine nucleotide binding protein (G protein), q polypeptide              |
| Chemokine signaling pathway                                | AL136787, NM_014800, AK126565   | engulfment and cell motility 1                                             |
|                                                            | NM_001556, BC108694             | inhibitor of kappa light polypeptide gene enhancer in B-cells, kinase beta |
| Chronic myeloid leukemia                                   | NM_001556, BC108694             | inhibitor of kappa light polypeptide gene enhancer in B-cells, kinase beta |
| Cytosolic DNA-sensing pathway                              | NM_001556, BC108694             | inhibitor of kappa light polypeptide gene enhancer in B-cells, kinase beta |
| Epithelial cell signaling in Helicobacter pylori infection | NM_001556, BC108694             | inhibitor of kappa light polypeptide gene enhancer in B-cells, kinase beta |
| Ether lipid metabolism                                     | AK095284                        | lysocardiolipin acyltransferase 1                                          |
|                                                            | NM_002072, BC057777             | guanine nucleotide binding protein (G protein), q polypeptide              |
| Gap junction                                               | NM_002067                       | guanine nucleotide binding protein (G protein), alpha 11 (Gq class)        |
|                                                            | AK095284                        | lysocardiolipin acyltransferase 1                                          |
| Glycerolipid metabolism                                    | AK095284                        | lysocardiolipin acyltransferase 1                                          |
| Glycerophospholipid metabolism                             | AK095284                        | lysocardiolipin acyltransferase 1                                          |
| GnRH signaling pathway                                     | NM_002072, BC057777             | guanine nucleotide binding protein (G protein), q polypeptide              |
|                                                            | NM_002067                       | guanine nucleotide binding protein (G protein), alpha 11 (Gq class)        |
| Huntington's disease                                       | NM_002072, BC057777             | guanine nucleotide binding protein (G protein), q polypeptide              |
|                                                            | NM_015477                       | SIN3 homolog A, transcription regulator (yeast)                            |
| Insulin signaling pathway                                  | NM_001556, BC108694             | inhibitor of kappa light polypeptide gene enhancer in B-cells, kinase beta |
| Keratan sulfate biosynthesis                               | NM_178155, NM_178157, NM_004480 | fucosyltransferase 8 (alpha (1,6) fucosyltransferase)                      |
| Limonene and pinene degradation                            | AK095284                        | lysocardiolipin acyltransferase 1                                          |
| Long-term depression                                       | NM_002067                       | guanine nucleotide binding protein (G protein), alpha 11 (Gq class)        |
|                                                            | NM_002072, BC057777             | guanine nucleotide binding protein (G protein), q polypeptide              |
| Long-term potentiation                                     | NM_002072, BC057777             | guanine nucleotide binding protein (G protein), q polypeptide              |

|                                       |                                                |                                                                            |
|---------------------------------------|------------------------------------------------|----------------------------------------------------------------------------|
| MAPK signaling pathway                | NM_001556, BC108694                            | inhibitor of kappa light polypeptide gene enhancer in B-cells, kinase beta |
| Melanogenesis                         | NM_002072, BC057777                            | guanine nucleotide binding protein (G protein), q polypeptide              |
| Neurotrophin signaling pathway        | NM_001556, BC108694                            | inhibitor of kappa light polypeptide gene enhancer in B-cells, kinase beta |
| N-Glycan biosynthesis                 | NM_178155,<br>NM_178157,<br>NM_004480          | fucosyltransferase 8 (alpha (1,6) fucosyltransferase)                      |
| NOD-like receptor signaling pathway   | NM_001556, BC108694                            | inhibitor of kappa light polypeptide gene enhancer in B-cells, kinase beta |
| Pancreatic cancer                     | NM_001556, BC108694                            | inhibitor of kappa light polypeptide gene enhancer in B-cells, kinase beta |
| Pathways in cancer                    | NM_001556, BC108694                            | inhibitor of kappa light polypeptide gene enhancer in B-cells, kinase beta |
| Phenylalanine metabolism              | AK095284                                       | lysocardiolipin acyltransferase 1                                          |
| Prostate cancer                       | NM_001556, BC108694                            | inhibitor of kappa light polypeptide gene enhancer in B-cells, kinase beta |
| Regulation of actin cytoskeleton      | NM_005964, AB210026<br>NM_002473               | myosin, heavy chain 10, non-muscle<br>myosin, heavy chain 9, non-muscle    |
| Regulation of autophagy               | BC000091, NM_006395                            | ATG7 autophagy related 7 homolog ( <i>S. cerevisiae</i> )                  |
| RIG-I-like receptor signaling pathway | NM_001556, BC108694                            | inhibitor of kappa light polypeptide gene enhancer in B-cells, kinase beta |
| Small cell lung cancer                | NM_001556, BC108694                            | inhibitor of kappa light polypeptide gene enhancer in B-cells, kinase beta |
| T cell receptor signaling pathway     | NM_001556, BC108694                            | inhibitor of kappa light polypeptide gene enhancer in B-cells, kinase beta |
| Tight junction                        | NM_005964, AB210026                            | myosin, heavy chain 10, non-muscle                                         |
|                                       | AY520816, AY520817,<br>NM_002474,<br>NM_022844 | myosin, heavy chain 11, smooth muscle                                      |
|                                       | NM_002473                                      | myosin, heavy chain 9, non-muscle                                          |
| Toll-like receptor signaling pathway  | NM_001556, BC108694                            | inhibitor of kappa light polypeptide gene enhancer in B-cells, kinase beta |
| Type II diabetes mellitus             | NM_001556, BC108694                            | inhibitor of kappa light polypeptide gene enhancer in B-cells, kinase beta |
| Tyrosine metabolism                   | AK095284                                       | lysocardiolipin acyltransferase 1                                          |
| Vascular smooth muscle contraction    | NM_002067                                      | guanine nucleotide binding protein (G protein), alpha 11 (Gq class)        |
|                                       | NM_002072, BC057777                            | guanine nucleotide binding protein (G protein), q polypeptide              |
|                                       | AY520816, AY520817,<br>NM_002474,<br>NM_022844 | myosin, heavy chain 11, smooth muscle                                      |
| Viral myocarditis                     | NM_002473                                      | myosin, heavy chain 9, non-muscle                                          |
|                                       | NM_005964, AB210026                            | myosin, heavy chain 10, non-muscle                                         |
|                                       | AY520816, AY520817,<br>NM_002474,<br>NM_022844 | myosin, heavy chain 11, smooth muscle                                      |
